# Supplementary material for: Quercetin Inhibits Hephaestin Expression and Iron Transport in Intestinal Cells: Possible Role of PI3K Pathway
Source: MDPI journal article supplement (doi:10.3390/nu15051205), 2023-02-28
Supplement: s1 [file s1]

### Supplementary Figure

#### Quercetin inhibits hephaestin expression and iron transport in intestinal cells: Possible role of PI3K pathway

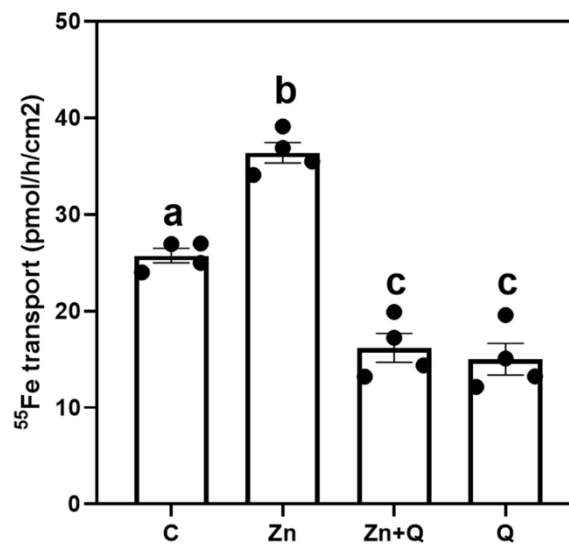

**Supplementary Figure S1. Effect of quercetin on zinc induced iron transport:** Differentiated Caco-2 cells grown in transwell plates were pre-treated with quercetin 100  $\mu\text{mol/L}$  quercetin followed by Zn (100  $\mu\text{mol/L}$ ) for 24 h, after which  $^{55}\text{Fe}$  iron transport was measured as described in methods section. The experiment was performed in quadruplicates. The bars are mean  $\pm$  SEM and the bars without common superscripts differ significantly ( $p < 0.05$ ); one way ANOVA, post-hoc Tukey's test.
